# Supplementary material for: A mussel inspired self-expandable tubular hydrogel with shape memory under NIR for potential biomedical applications
Source: Royal Society of Chemistry journal article supplement (doi:10.1039/c7tb00539c), 2017-01-01
Supplement: c7tb00539c3.pdf [file c7tb00539c3.pdf]

## Supporting Information

# Mussel Inspired Self-Expandable Tubular Hydrogel With Shape Memory Under NIR for Potential Biomedical Application

Francis O Obiweluozor<sup>2</sup>, Amin GhavamiNejad<sup>1</sup>, Bikendra Maharjan<sup>1</sup>, Jinwoo Kim<sup>1</sup>, Chan  
Hee Park<sup>2\*</sup> and Cheol Sang Kim<sup>1, 2\*</sup>

<sup>1</sup> *Department of Bionanosystem Engineering, Graduate School, Chonbuk National University,  
Jeonju 561-756, Republic of Korea.*

<sup>2</sup> *Mechanical Design Engineering, Chonbuk National University, Jeonju 561-756, Republic  
of Korea.*

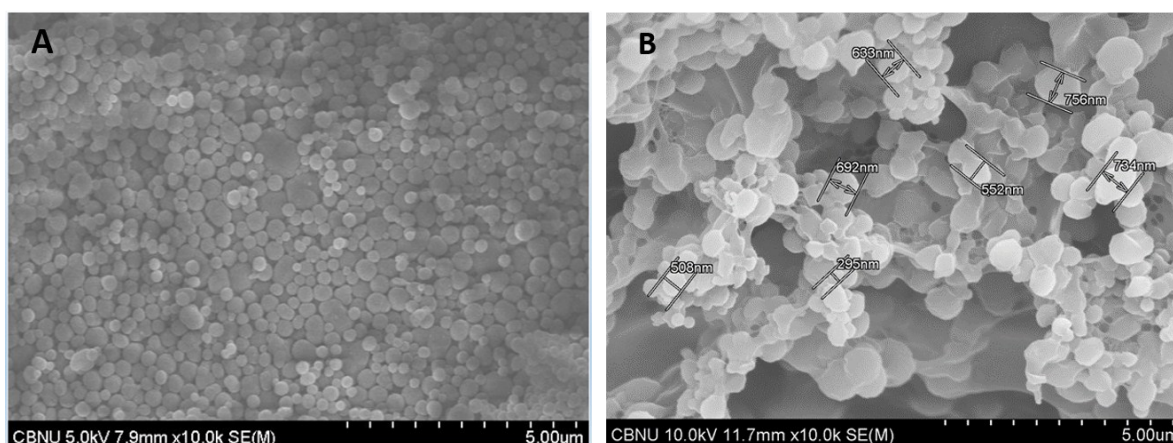

Figure 1: FESEM micrograph of (A) PDNs with diameter around 260 nm. (B) P(AA-co-MMA) @0.3%PDNs hydrogel matrix showing an average diameter of 645 nm polydopamine nanospheres.

**Movie are provided as follows:**

**Movie S1.** Shape memory recovery of cylindrical shape hydrogel P(AA-co-MMA) @0.1%PDNs, P(AA-co-MMA) @0.3%PDNs and P(AA-co-MMA) @0.5%PDNs under NIR irradiation.

**Movie S2.** Shape memory recovery of organomy, spiral and rod shaped from P(AA-co-MMA) @0.3%PDNs under NIR.
